# Supplementary material for: Development of a new procedure for selecting internal standards for gas chromatography/mass spectrometry-based plasma metabolome analysis
Source: Royal Society of Chemistry journal article supplement (doi:10.1039/d5ay01659b), 2025-01-01
Supplement: d5ay01659b1.pdf [file d5ay01659b1.pdf]

# Supplementary Figure 1

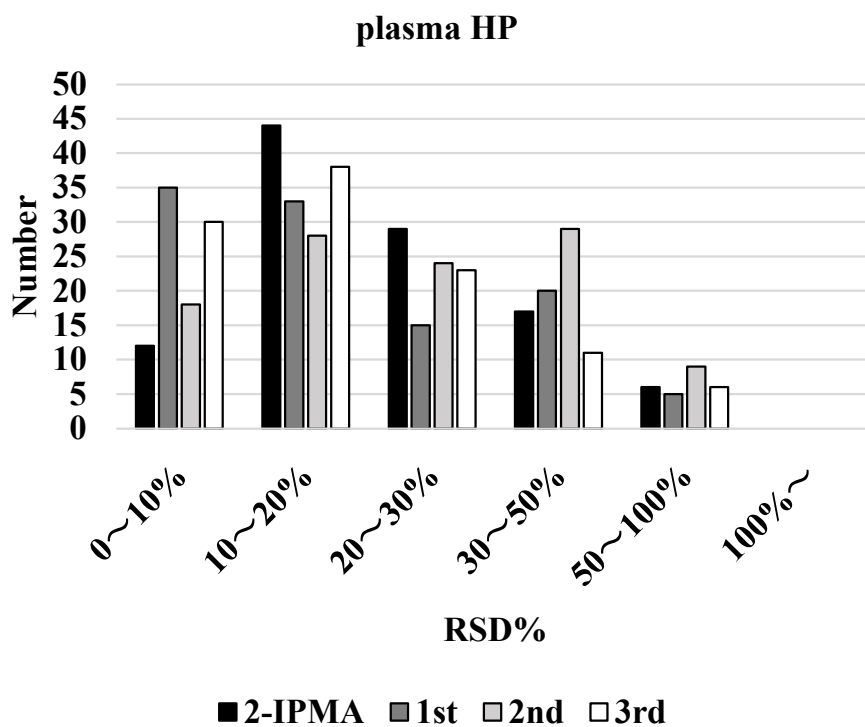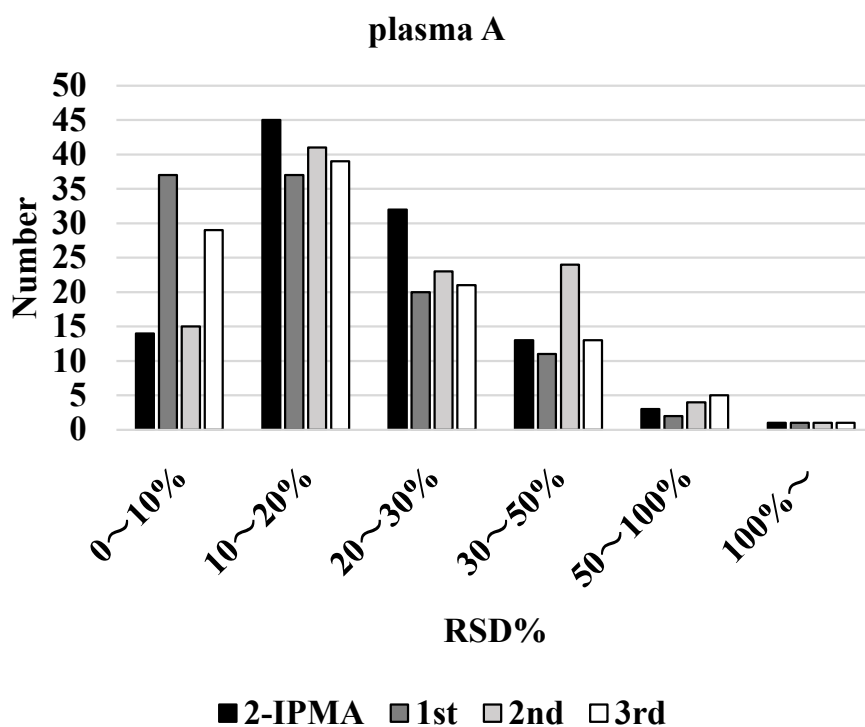

## Supplementary Figure 1

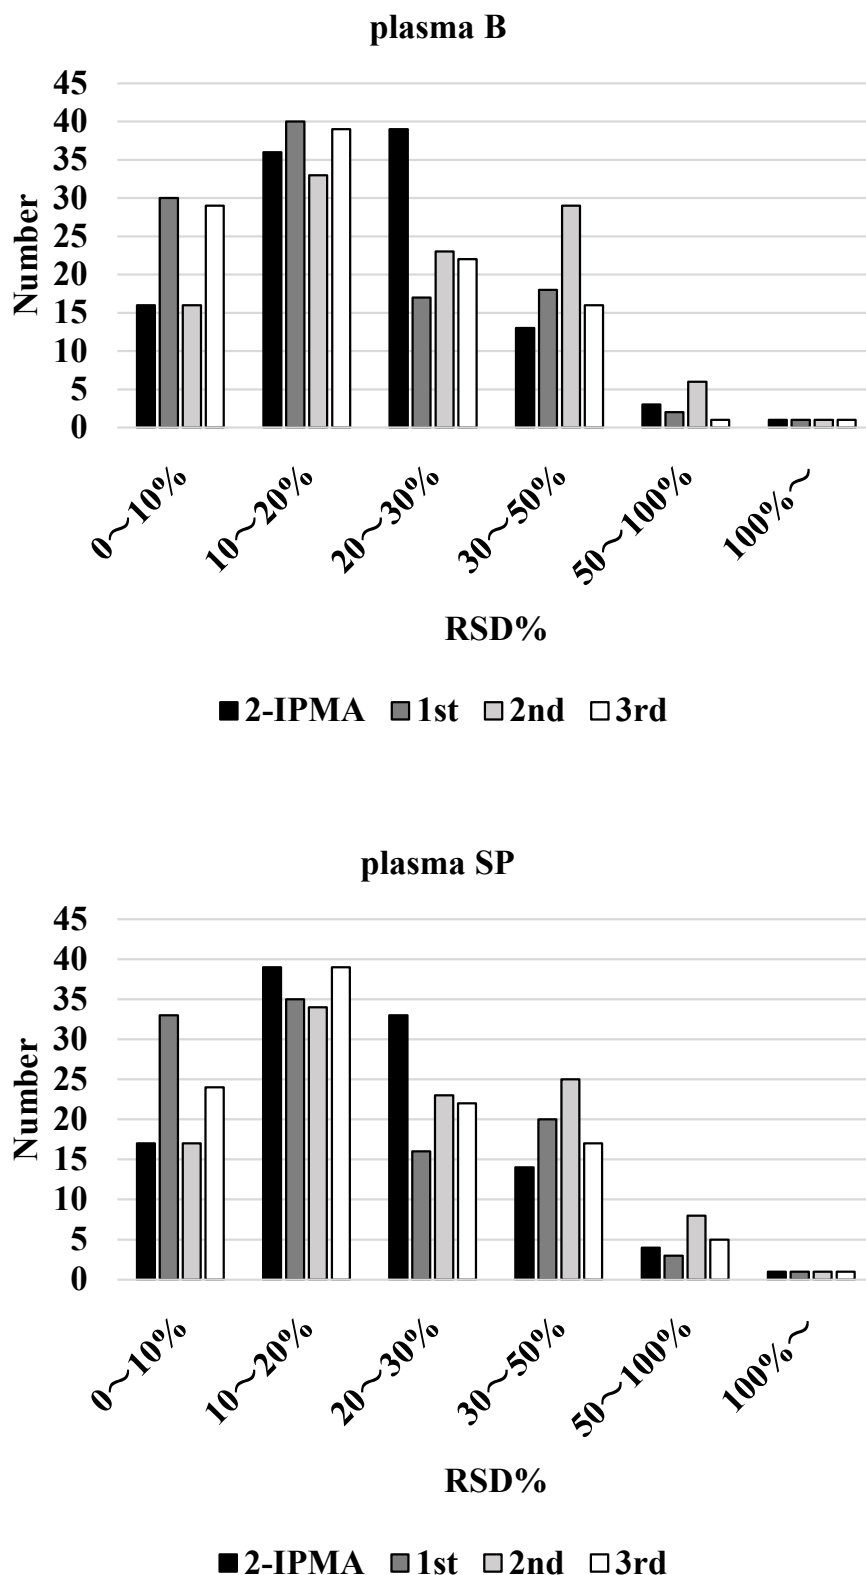

**Supplementary Figure 1. The RSD% values for the merged data for plasma P, A, B, and SP obtained at the three facilities in experiment B**

The black, gray, light gray, and white bars show the peak area values obtained from plasma P, A, B, and SP using 2-isopropylmalic acid (2-IPMA)-, 1st internal standard (IS)-, 2nd IS-, or 3rd IS-based correction (each N=4).
