# Supplementary material for: Development of a new procedure for selecting internal standards for gas chromatography/mass spectrometry-based plasma metabolome analysis
Source: Royal Society of Chemistry journal article supplement (doi:10.1039/d5ay01659b), 2025-01-01
Supplement: d5ay01659b2.pdf [file d5ay01659b2.pdf]

Supplementary Table 1. Group classification produced by hierarchical cluster analysis of data for plasma P

| Group   | Name                                    | Retention index | Class                                  | Subclass                                  |
|---------|-----------------------------------------|-----------------|----------------------------------------|-------------------------------------------|
| Group 1 | Glyoxylic acid-meto-TMS                 | 986             | Carboxylic acids and derivatives       | Carboxylic acids                          |
|         | Pyruvic acid-meto-TMS                   | 1046            | Keto acids and derivatives             | Alpha-keto acids and derivatives          |
|         | Lactic acid-2TMS                        | 1051            | Hydroxy acids and derivatives          | Alpha hydroxy acids and derivatives       |
|         | Alanine-2TMS                            | 1095            | Carboxylic acids and derivatives       | Amino acids, peptides, and analogues      |
|         | Glycine-2TMS                            | 1116            | Carboxylic acids and derivatives       | Amino acids, peptides, and analogues      |
|         | Glycerol-3TMS                           | 1256            | Organooxygen compounds                 | Carbohydrates and carbohydrate conjugates |
|         | Isoleucine-2TMS                         | 1281            | Carboxylic acids and derivatives       | Amino acids, peptides, and analogues      |
|         | Glyceric acid-3TMS                      | 1312            | Organooxygen compounds                 | Carbohydrates and carbohydrate conjugates |
|         | Serine-3TMS                             | 1343            | Carboxylic acids and derivatives       | Amino acids, peptides, and analogues      |
|         | Threonine-3TMS                          | 1367            | Carboxylic acids and derivatives       | Amino acids, peptides, and analogues      |
|         | Creatinine-3TMS                         | 1548            | Carboxylic acids and derivatives       | Amino acids, peptides, and analogues      |
|         | 5-Dehydroquinic acid-meto-4TMS          | 1858            | Hydroxy acids and derivatives          | Alpha hydroxy acids and derivatives       |
|         | Glucosamine-5TMS(1)                     | 1884            | Organooxygen compounds                 | Carbohydrates and carbohydrate conjugates |
| Group 2 | Paraxanthine-TMS                        | 1993            | Imidazopyrimidines                     | Purines and purine derivatives            |
|         | 3-Aminopropanoic acid-2TMS              | 1185            | Carboxylic acids and derivatives       | Amino acids, peptides, and analogues      |
|         | 2-Ketoisocaproic acid-meto-TMS(2)       | 1206            | Keto acids and derivatives             | Short-chain keto acids and derivatives    |
|         | Benzoic acid-TMS                        | 1255            | Benzene and substituted derivatives    | Benzoic acids and derivatives             |
|         | 2-Aminoethanol-3TMS                     | 1255            | Organonitrogen compounds               | Amines                                    |
|         | Leucine-2TMS                            | 1260            | Carboxylic acids and derivatives       | Amino acids, peptides, and analogues      |
|         | Proline-2TMS                            | 1291            | Carboxylic acids and derivatives       | Amino acids, peptides, and analogues      |
|         | Decanoic acid-TMS                       | 1453            | Fatty Acyls                            | Fatty acids and conjugates                |
|         | Taurine-3TMS                            | 1663            | Organic sulfonic acids and derivatives | Organosulfonic acids and derivatives      |
|         | Glucose-meto-5TMS(2)                    | 1882            | Organooxygen compounds                 | Carbohydrates and carbohydrate conjugates |
| Group 3 | 2-Hydroxyisobutyric acid-2TMS           | 1052            | Hydroxy acids and derivatives          | Alpha hydroxy acids and derivatives       |
|         | Glycolic acid-2TMS                      | 1069            | Hydroxy acids and derivatives          | Alpha hydroxy acids and derivatives       |
|         | 2-Hydroxybutyric acid-2TMS              | 1117            | Hydroxy acids and derivatives          | Alpha hydroxy acids and derivatives       |
|         | 3-Hydroxypropionic acid-2TMS            | 1135            | Hydroxy acids and derivatives          | Beta hydroxy acids and derivatives        |
|         | 2-Hydroxyisovaleric acid-2TMS           | 1151            | Fatty Acyls                            | Fatty acids and conjugates                |
|         | 3-Hydroxybutyric acid-2TMS              | 1152            | Hydroxy acids and derivatives          | Beta hydroxy acids and derivatives        |
|         | Glycine-3TMS                            | 1295            | Carboxylic acids and derivatives       | Amino acids, peptides, and analogues      |
|         | 3-Aminopropanoic acid-3TMS              | 1416            | Carboxylic acids and derivatives       | Amino acids, peptides, and analogues      |
|         | Isocitric acid-4TMS                     | 1793            | Carboxylic acids and derivatives       | Tricarboxylic acids and derivatives       |
|         | Ornithine-4TMS                          | 1796            | Carboxylic acids and derivatives       | Amino acids, peptides, and analogues      |
|         | N-Acetylglutamine-3TMS                  | 1898            | Carboxylic acids and derivatives       | Amino acids, peptides, and analogues      |
|         | Tryptophan-2TMS                         | 2211            | Indoles and derivatives                | Indolyl carboxylic acids and derivatives  |
| Group 4 | Tryptophan-3TMS                         | 2214            | Indoles and derivatives                | Indolyl carboxylic acids and derivatives  |
|         | Sarcosine-2TMS                          | 1131            | Carboxylic acids and derivatives       | Amino acids, peptides, and analogues      |
|         | Urea-2TMS                               | 1239            | Organic carbonic acids and derivatives | Ureas                                     |
| Group 5 | 2-Keto-isovaleric acid-meto-TMS         | 1102            | Keto acids and derivatives             | Short-chain keto acids and derivatives    |
|         | Oxalic acid-2TMS                        | 1126            | Carboxylic acids and derivatives       | Dicarboxylic acids and derivatives        |
|         | 3-Methyl-2-ketovaleric acid-meto-TMS(1) | 1172            | Keto acids and derivatives             | Short-chain keto acids and derivatives    |
|         | 3-Methyl-2-ketovaleric acid-meto-TMS(2) | 1192            | Keto acids and derivatives             | Short-chain keto acids and derivatives    |
|         | Valine-2TMS                             | 1204            | Carboxylic acids and derivatives       | Amino acids, peptides, and analogues      |
|         | Acetylglycine-TMS                       | 1288            | Carboxylic acids and derivatives       | Amino acids, peptides, and analogues      |
|         | Fumaric acid-2TMS                       | 1344            | Carboxylic acids and derivatives       | Dicarboxylic acids and derivatives        |
|         | Glutaric acid-2TMS                      | 1397            | Carboxylic acids and derivatives       | Dicarboxylic acids and derivatives        |
|         | Threitol-4TMS                           | 1471            | Organooxygen compounds                 | Carbohydrates and carbohydrate conjugates |
|         | Aspartic acid-3TMS                      | 1503            | Carboxylic acids and derivatives       | Amino acids, peptides, and analogues      |
|         | 3-Aminoglutaric acid-2TMS               | 1504            | Non data                               | Non data                                  |
|         | 4-Hydroxyproline-3TMS                   | 1511            | Carboxylic acids and derivatives       | Amino acids, peptides, and analogues      |
|         | Methionine-2TMS                         | 1513            | Carboxylic acids and derivatives       | Amino acids, peptides, and analogues      |
|         | 5-Oxoproline-2TMS                       | 1522            | Carboxylic acids and derivatives       | Amino acids, peptides, and analogues      |
|         | 2-Ketoglutaric acid-meto-2TMS           | 1566            | Keto acids and derivatives             | Gamma-keto acids and derivatives          |
|         | Glutamic acid-3TMS                      | 1603            | Carboxylic acids and derivatives       | Amino acids, peptides, and analogues      |
|         | Phenylalanine-2TMS                      | 1623            | Carboxylic acids and derivatives       | Amino acids, peptides, and analogues      |
|         | Xylulose-meto-4TMS                      | 1642            | Organooxygen compounds                 | Carbohydrates and carbohydrate conjugates |
|         | Glucose-meto-5TMS(1)                    | 1861            | Organooxygen compounds                 | Carbohydrates and carbohydrate conjugates |
|         | 4-Hydroxyphenyllactic acid-3TMS         | 1884            | Phenylpropanoic acids                  | Not Available                             |
|         | Glucuronic acid-meto-5TMS(1)            | 1902            | Organooxygen compounds                 | Carbohydrates and carbohydrate conjugates |
|         | Tyramine-3TMS                           | 1909            | Benzene and substituted derivatives    | Phenethylamines                           |
|         | Tyrosine-3TMS                           | 1929            | Carboxylic acids and derivatives       | Amino acids, peptides, and analogues      |
|         | Galacturonic acid-meto-5TMS(2)          | 1931            | Organooxygen compounds                 | Carbohydrates and carbohydrate conjugates |
|         | N-Acetyl-Ornithine-4TMS                 | 1952            | Carboxylic acids and derivatives       | Amino acids, peptides, and analogues      |
|         | Indol-3-acetic acid-2TMS                | 1974            | Indoles and derivatives                | Indolyl carboxylic acids and derivatives  |
|         | Inositol-6TMS                           | 2058            | Organooxygen compounds                 | Alcohols and polyols                      |
|         | 3-Indolepropionic acid-2TMS             | 2095            | Indoles and derivatives                | Indolyl carboxylic acids and derivatives  |

|          |                               |      |                                  |                                           |
|----------|-------------------------------|------|----------------------------------|-------------------------------------------|
| Group 6  | 2-Aminoisobutyric acid-2TMS   | 1135 | Carboxylic acids and derivatives | Amino acids, peptides, and analogues      |
|          | Nonanoic acid-TMS             | 1357 | Fatty Acyls                      | Fatty acids and conjugates                |
|          | Malic acid-3TMS               | 1472 | Hydroxy acids and derivatives    | Beta hydroxy acids and derivatives        |
|          | Glutamine-3TMS                | 1762 | Carboxylic acids and derivatives | Amino acids, peptides, and analogues      |
|          | Mannose-meto-5TMS(1)          | 1849 | Organooxygen compounds           | Carbohydrates and carbohydrate conjugates |
|          | Lysine-4TMS                   | 1900 | Carboxylic acids and derivatives | Amino acids, peptides, and analogues      |
|          | Palmitoleic acid-TMS          | 2026 | Fatty Acyls                      | Fatty acids and conjugates                |
|          | Linoleic acid-TMS             | 2210 | Fatty Acyls                      | Lineolic acids and derivatives            |
| Group 7  | Elaidic acid-TMS              | 2221 | Fatty Acyls                      | Fatty acids and conjugates                |
|          | 2-Aminobutyric acid-2TMS      | 1164 | Carboxylic acids and derivatives | Amino acids, peptides, and analogues      |
|          | Isoleucine-TMS                | 1178 | Carboxylic acids and derivatives | Amino acids, peptides, and analogues      |
|          | Serine-2TMS                   | 1250 | Carboxylic acids and derivatives | Amino acids, peptides, and analogues      |
|          | Octanoic acid-TMS             | 1260 | Fatty Acyls                      | Fatty acids and conjugates                |
|          | Phosphoric acid-3TMS          | 1260 | Non-metal oxoanionic compounds   | Non-metal phosphates                      |
|          | Succinic acid-2TMS            | 1307 | Carboxylic acids and derivatives | Dicarboxylic acids and derivatives        |
|          | Cysteine-3TMS                 | 1543 | Carboxylic acids and derivatives | Amino acids, peptides, and analogues      |
|          | 2-Hydroxyglutaric acid-3TMS   | 1556 | Hydroxy acids and derivatives    | Short-chain hydroxy acids and derivatives |
|          | Lauric acid-TMS               | 1647 | Fatty Acyls                      | Fatty acids and conjugates                |
|          | Ribose-meto-4TMS              | 1648 | Organooxygen compounds           | Carbohydrates and carbohydrate conjugates |
|          | 2-Deoxy-glucose-4TMS(1)       | 1698 | Fatty Acyls                      | Fatty alcohols                            |
|          | Sorbose-meto-5TMS(1)          | 1833 | Organooxygen compounds           | Carbohydrates and carbohydrate conjugates |
| Group 8  | Oleic acid-TMS                | 2214 | Fatty Acyls                      | Fatty acids and conjugates                |
|          | Myristic acid-TMS             | 1844 | Fatty Acyls                      | Fatty acids and conjugates                |
| Group 9  | 3-Hydroxyisovaleric acid-2TMS | 1200 | Fatty Acyls                      | Fatty acids and conjugates                |
|          | Ribulose-meto-4TMS            | 1646 | Organooxygen compounds           | Carbohydrates and carbohydrate conjugates |
| Group 10 | meso-Erythritol-4TMS          | 1480 | Organooxygen compounds           | Carbohydrates and carbohydrate conjugates |
|          | 2-Isopropylmalic acid-3TMS    | 1560 | Fatty Acyls                      | Fatty acids and conjugates                |
|          | Arabinose-meto-4TMS           | 1632 | Organooxygen compounds           | Carbohydrates and carbohydrate conjugates |
|          | Arabitol-5TMS                 | 1685 | Organooxygen compounds           | Carbohydrates and carbohydrate conjugates |
|          | Citric acid-4TMS              | 1794 | Carboxylic acids and derivatives | Tricarboxylic acids and derivatives       |
|          | Arginine-3TMS                 | 1808 | Carboxylic acids and derivatives | Amino acids, peptides, and analogues      |
|          | Psicose-meto-5TMS(1)          | 1819 | Organooxygen compounds           | Carbohydrates and carbohydrate conjugates |
|          | 1,5-Anhydro-glucitol-4TMS     | 1831 | Organooxygen compounds           | Carbohydrates and carbohydrate conjugates |
|          | Fructose-meto-5TMS(2)         | 1844 | Organooxygen compounds           | Carbohydrates and carbohydrate conjugates |
|          | Histidine-3TMS                | 1912 | Carboxylic acids and derivatives | Amino acids, peptides, and analogues      |
|          | Glucuronic acid-meto-5TMS(2)  | 1920 | Organooxygen compounds           | Carbohydrates and carbohydrate conjugates |
|          | 1-Hexadecanol-TMS             | 1951 | Fatty Acyls                      | Fatty alcohols                            |
|          | Uric acid-4TMS                | 2082 | Imidazopyrimidines               | Purines and purine derivatives            |
|          | Margaric acid-TMS             | 2138 | Fatty Acyls                      | Fatty acids and conjugates                |
|          | Sucrose-8TMS                  | 2579 | Organooxygen compounds           | Carbohydrates and carbohydrate conjugates |
| Group 11 | Palmitic acid-TMS             | 2040 | Fatty Acyls                      | Fatty acids and conjugates                |
|          | Stearic acid-TMS              | 2238 | Fatty Acyls                      | Fatty acids and conjugates                |
| Group 12 | Sorbitol-6TMS                 | 1898 | Organooxygen compounds           | Carbohydrates and carbohydrate conjugates |

In the group classification performed in Experiment A, the metabolites classified into each group are listed. For each metabolite, the retention index, class as chemical taxonomy, and subclass as chemical taxonomy are also listed. Class and subclass as chemical taxonomy are based on The Human Metabolome Database (<https://www.hmdb.ca/>).
